# Supplementary material for: E-cadherin can limit the transforming properties of activating β-catenin mutations
Source: PubMed Central journal article supplement (PMC4570519; doi:10.15252/embj.201591739), 2015-08-03
Supplement: embj0034-2321-sd2.pdf [file embj0034-2321-sd2.pdf]

## Expanded View Figures

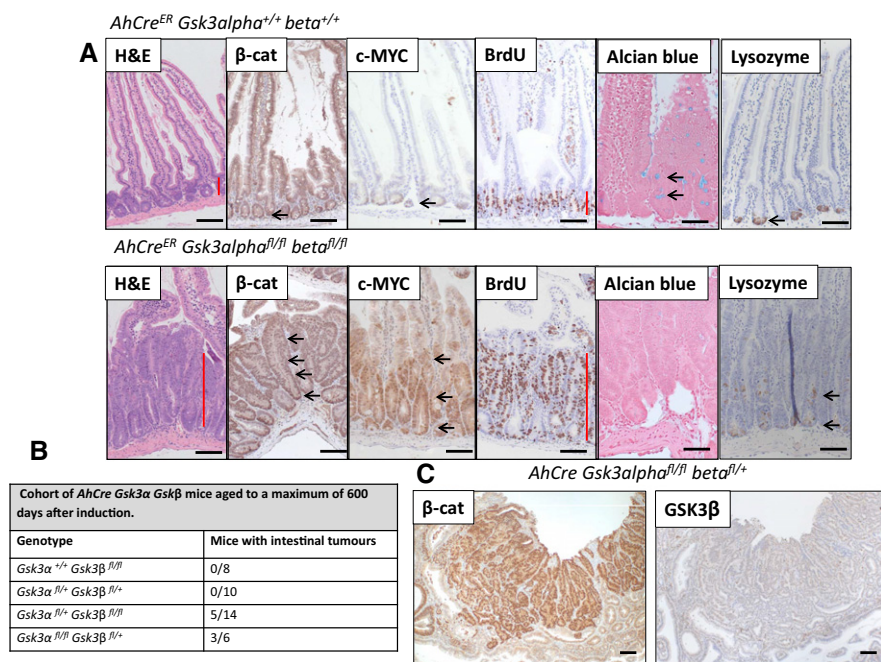

**Figure EV1. Only deletion of both *Gsk3alpha* and *Gsk3beta* leads to crypt-progenitor-cell phenotype.**

- A** Small Intestine of mice at day 6 after induction. Loss of *Gsk3alpha* and *Gsk3beta* (*AhCre<sup>ER</sup> Gsk3alpha<sup>fl/fl</sup> Gsk3beta<sup>fl/fl</sup>*) leads to accumulation of nuclear  $\beta$ -catenin and upregulation of cMyc (arrows). The crypt-progenitor cell phenotype (red bar) is characterised by increased proliferation (BrdU) and perturbed differentiation/localisation of goblet and Paneth cells (Alcian Blue, Lysozyme respectively, arrows). Scale bar, 100  $\mu$ m.
- B** Table shows cohort of *AhCre Gsk3alpha Gsk3beta* mice aged until signs of intestinal tumour burden, genotypes as indicated. Note, mice homozygous for *Gsk3beta* deletion, or with only one copy of *GSK3alpha* and *GSK3beta*, did not develop intestinal tumours.
- C** An adenoma from an aged mouse deficient for 3 alleles of *Gsk3alpha* and *Gsk3beta* (*AhCre GSK3alpha<sup>fl/fl</sup> beta<sup>fl/+</sup>*) showing that it developed after loss of the remaining *GSK3beta* allele. Scale bar, 100  $\mu$ m.

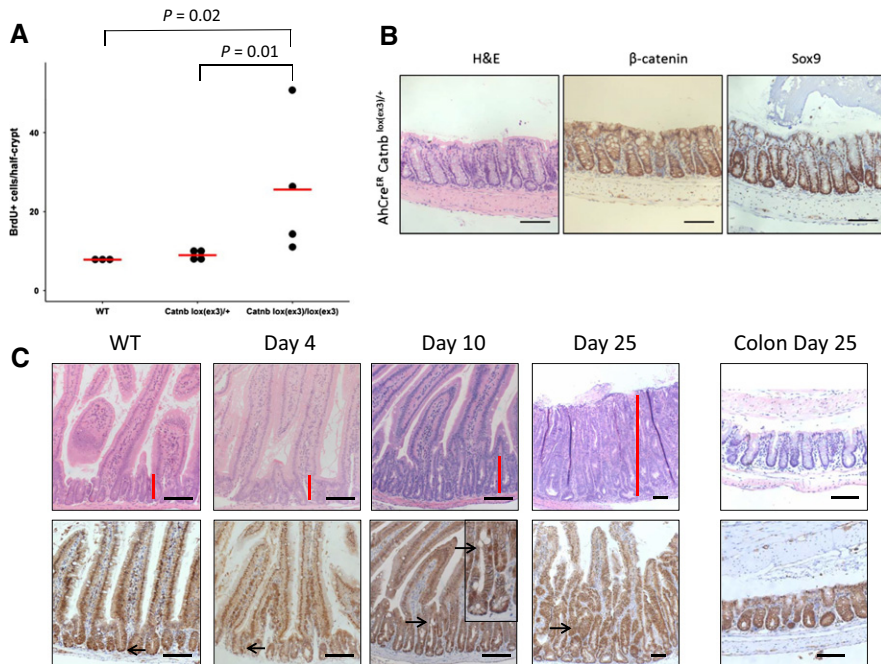

**Figure EV2. Single copy activation of  $\beta$ -catenin only slowly transforms the intestine.**

- A** Only activation of both alleles of  $\beta$ -catenin led to hyperproliferation in the small intestine. Proliferation of wild-type (WT), *AhCre<sup>ER</sup> Catnb<sup>lox(ex3)/+</sup>* and *AhCre<sup>ER</sup> Catnb<sup>lox(ex3)/lox(ex3)</sup>* mice 5 days after induction was scored by counting the number of BrdU-positive cells/half-crypt.  $N \geq 3$  per group, at least 25 crypts per mouse were scored,  $P$ -value of one-sided Mann-Whitney  $U$ -test.
- B** Activation of one of copy  $\beta$ -catenin in an aged *AhCre<sup>ER</sup> Catnb<sup>lox(ex3)/+</sup>* at day 25 post-induction with no phenotype in the colon. For comparison to a WT colon, see Appendix Fig S3. Scale bar, 100  $\mu$ m.
- C** Activation of one copy of  $\beta$ -catenin in *VilCre<sup>ER</sup> Catnb<sup>lox(ex3)/+</sup>* leads to the same crypt-progenitor cell phenotype (red bar) with similar kinetics as observed in *AhCre<sup>ER</sup> Catnb<sup>lox(ex3)/+</sup>* mice. Scale bar, 100  $\mu$ m.

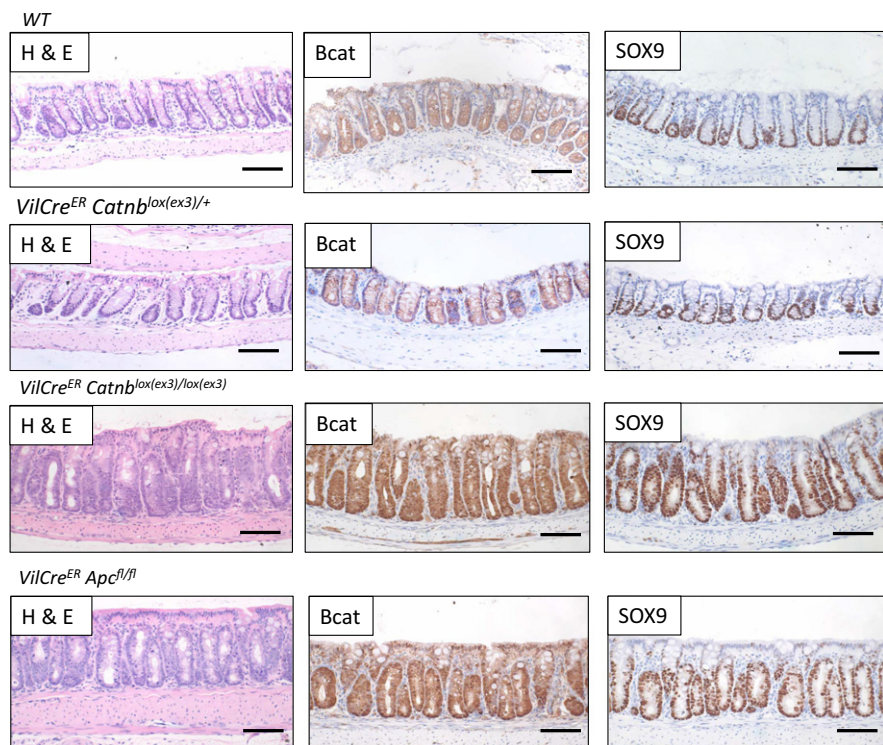

**Figure EV3. Rapid colonic phenotype in *VilCre<sup>ER</sup> Catnb<sup>lox(ex3)/lox(ex3)</sup> and *Apc<sup>fl/fl</sup> mice, but not in *VilCre<sup>ER</sup> Catnb<sup>lox(ex3)/+</sup> mice.*****

Wild-type mice show very little nuclear  $\beta$ -catenin, and the expression of Sox9 is restricted to the bottom of the crypt. *VilCre<sup>ER</sup> Catnb<sup>lox(ex3)/+</sup>* show a similar phenotype. In contrast, *VilCre<sup>ER</sup> Catnb<sup>lox(ex3)/lox(ex3)</sup>* and *VilCre<sup>ER</sup> Apc<sup>fl/fl</sup>* mice show increased nuclear  $\beta$ -catenin and high expression of Sox9. Scale bar, 100  $\mu$ m. Mice were sampled at day 4 after induction.

***Lgr5Cre<sup>ER</sup> GSK3 alpha<sup>fl/fl</sup> beta<sup>fl/fl</sup>***

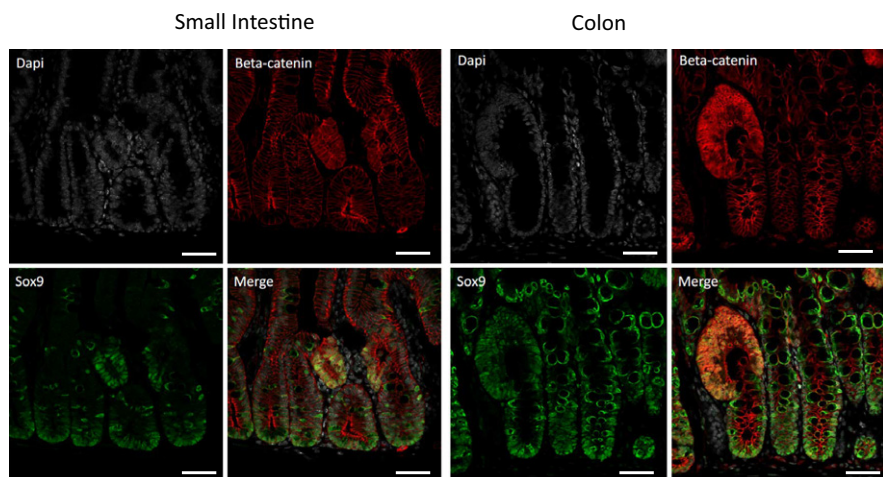

**Figure EV4. Complete loss of Gsk3 in *Lgr5-*positive stem cells leads to tumour formation in the small intestine and the colon.**

Immunofluorescence analysis shows intestinal lesions with accumulation of  $\beta$ -catenin and SOX9 in the small intestine and the colon, 25 days after induction. Scale bar, 50  $\mu$ m.

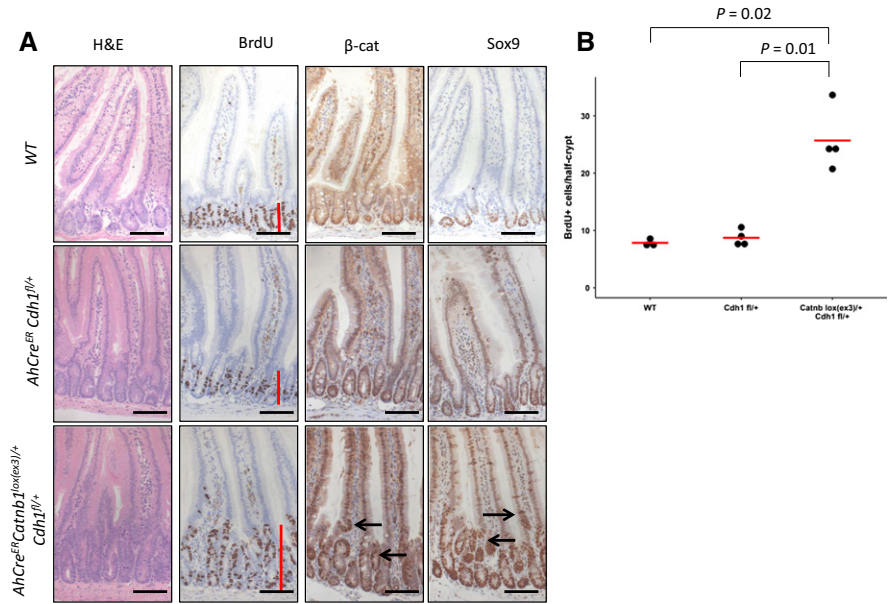

**Figure EV5. Haploinsufficiency for E-cadherin lowers the threshold for Wnt activation of  $\beta$ -catenin mutation.**

**A** *AhCre<sup>ER</sup> Cdh1<sup>fl/+</sup>* at day 5 post-induction shows no intestinal phenotype. *AhCre<sup>ER</sup> Catnb<sup>lox(ex3)/+</sup> Cdh1<sup>fl/+</sup>* mice show increased proliferation (BrdU, red line) and accumulation of  $\beta$ -catenin and Sox9 in cells higher up the crypt-villus axis (arrows). Scale bar, 100  $\mu$ m.

**B** Increased proliferation as scored by BrdU<sup>+</sup> cells per half-crypt.  $N \geq 3$ , statistics: one-sided Mann-Whitney *U*-test.
